# Supplementary material
Source: publisher figshare collection journal article supplement (https://frontiersin.figshare.com/ndownloader/files/22121880)
Supplement: Supplementary file [file 22121880]

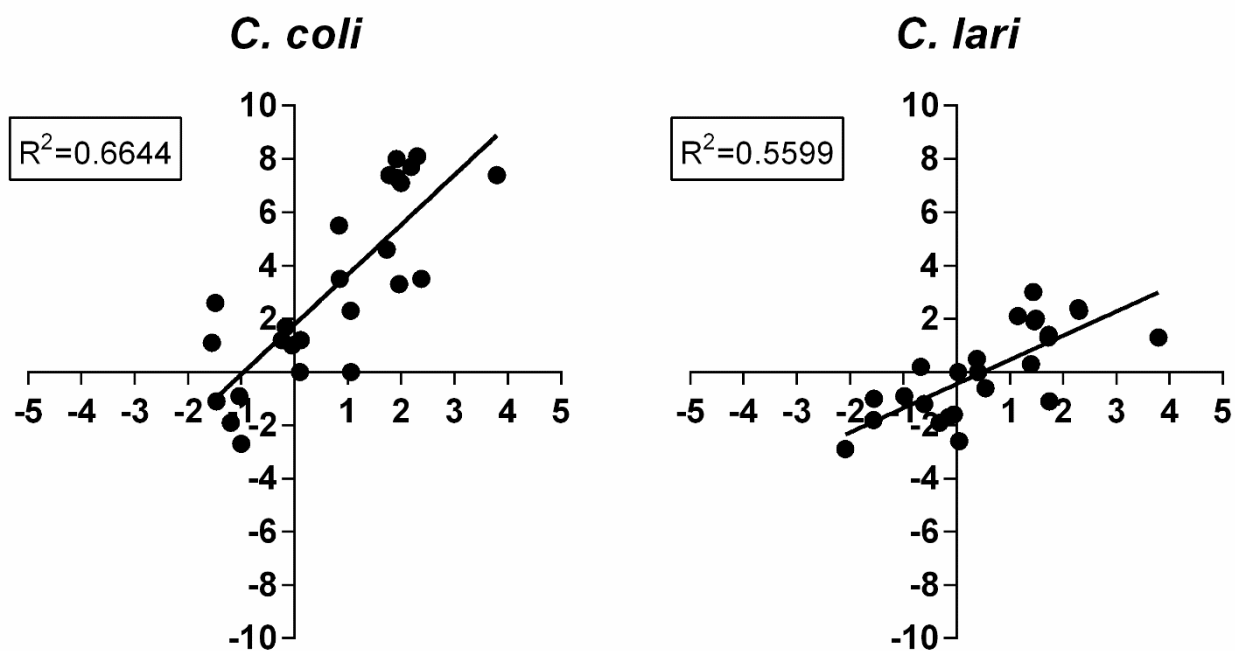

**Figure S1: Correlation of  $\log_2$  fold changes of gene expression by qRT-PCR and RNA-seq.**  
The correlation of the  $\log_2$  fold changes of selected gene expression after 30 min of heat stress determined by RNA-seq (x-axis) and qRT-PCR (y-axis) is depicted with corresponding  $R^2$  values for *C. coli* RM2228 and *C. lari* RM2100.
